# Supplementary material for: Increasing the quantity and quality of searching for current best evidence to answer clinical questions: protocol and intervention design of the MacPLUS FS Factorial Randomized Controlled Trials
Source: Springer Nature journal article supplement (doi:10.1186/s13012-014-0125-9), 2014-09-19
Supplement: MOESM2 [file 9772778]

## Additional File 2. Evidence Retrieval Coach: tailoring the educational videos to clinicians pattern of use

- The coach is composed of 8 short educational videos, lasting 1 to 1.30 minutes.
- Two types of triggers are implemented:
  - o Specific triggers that try and tailor the display of the video to users specific behaviours
  - o Weekly time triggers, as the trial unfolds.

| Name of short educational video                                                                            | 1. Specific Triggers                                                                                                                                                                                                                                 | 2. Triggers                       |
|------------------------------------------------------------------------------------------------------------|------------------------------------------------------------------------------------------------------------------------------------------------------------------------------------------------------------------------------------------------------|-----------------------------------|
| 1. Why use it?<br><i>[Answering questions with information overload]</i>                                   | *No trigger, sent at by e-mail and visible on the search page at the beginning of the trial                                                                                                                                                          | Time 0                            |
| 2. Enhancing Evidence-Based Clinical Practice<br><i>[Using parallel search in pre-appraised resources]</i> | *Available on the “Clinical Vital Links”                                                                                                                                                                                                             | After 1 week                      |
| 3. A pyramid of resources<br><i>[Overview of the architecture of evidence]</i>                             | * When clicking on the link under the pyramid: “6S model explained”                                                                                                                                                                                  | After 2 weeks                     |
| 4. Is one summary enough?<br><i>[Top layers: Summaries]</i>                                                | * After 2 searches when only PubMed links are clicked (regardless of whether filtered or unfiltered)<br>* After 2 searches when only the same summary is clicked (if this is too specific to be implemented, change to when 3 summaries are clicked. | After 3 weeks                     |
| 5. New and critically appraised evidence<br><i>[Middle layers: Preappraised research]</i>                  | * After 4 searches when clicking on PubMed only (filtered or unfiltered)                                                                                                                                                                             | After 4 weeks                     |
| 6. PubMed & the Clinical Queries<br><i>[Bottom layers: Non-preappraised research]</i>                      | *After 6 searches clicking only on unfiltered PubMed (if this is too specific to be implemented, change to after 6 searches clicking only on PubMed)                                                                                                 | After 5 weeks                     |
| 7. Preparing searchable questions<br><i>[Using the PICO framework]</i>                                     | * After 2 searches without clicking on any citation.<br>*After 2 searches with no citations retrieved in middle layers (i.e. excluding summaries and PubMed)                                                                                         | After 7 weeks                     |
| 8. Academic work<br><i>[Using a federated search for presentations, grants and research]</i>               | *When trying to download citations                                                                                                                                                                                                                   | After 8 weeks                     |
| <i>[Any video]</i>                                                                                         | Then display random video                                                                                                                                                                                                                            | Weekly until the end of the trial |
