# Supplementary material for: Increasing the quantity and quality of searching for current best evidence to answer clinical questions: protocol and intervention design of the MacPLUS FS Factorial Randomized Controlled Trials
Source: Springer Nature journal article supplement (doi:10.1186/s13012-014-0125-9), 2014-09-19
Supplement: MOESM4 [file 9772778]

**Additional File 4. Power as a function of difference in means, separately for our samples of postgraduates (n=429) and faculty (n=475)**

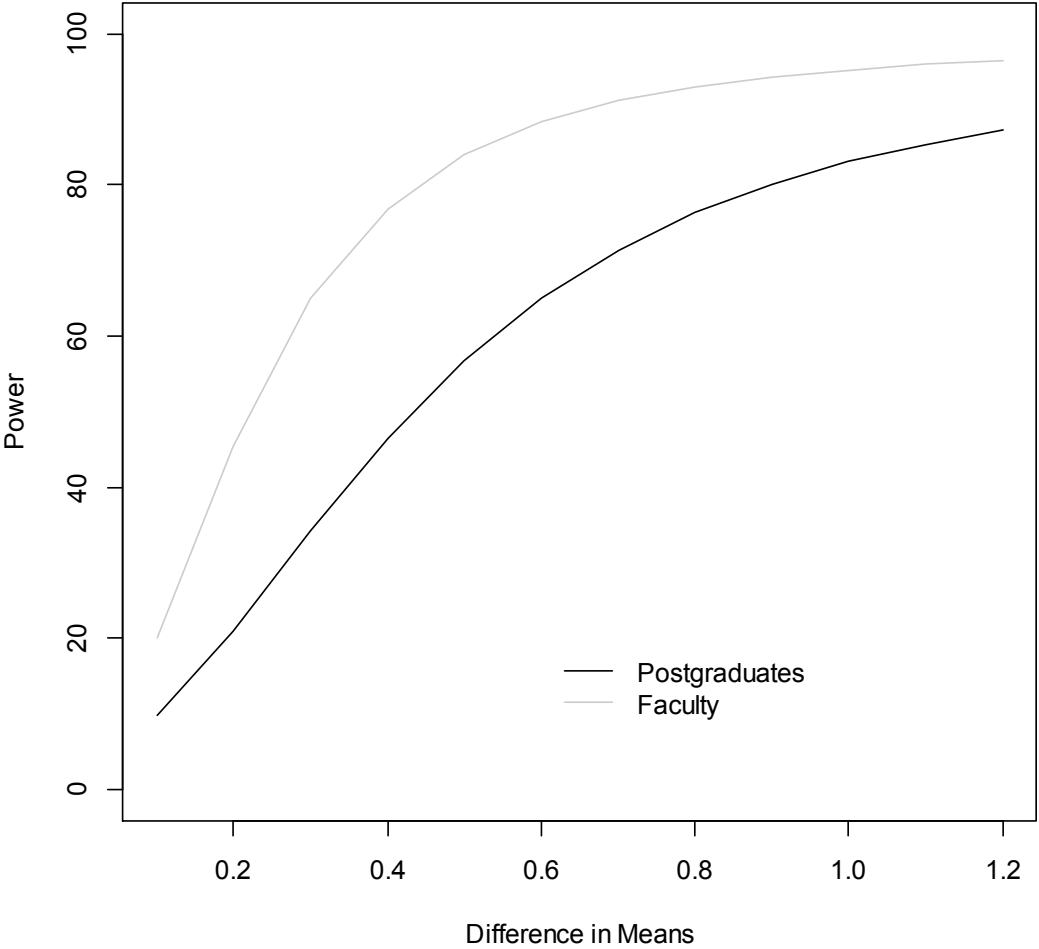

The distribution of searches is such that the standard deviation varies with the mean; baseline data suggested a linear relationship, with the standard deviation of searches in any given month being approximately  $0.15 + 4.84 \cdot \text{mean}$ . Since the primary analysis will use the mean number of searches per individual over a 6-month time frame, the actual standard deviation will be smaller than this; the standard deviation in this case is made up of within-individual variability and between-individual variability, and averaging over several months will diminish the within-individual variability. Baseline data suggested that taking 6-month averages reduced the standard deviation by 30%, and therefore the standard deviation was modelled as  $(0.15 + 4.84 \cdot \text{mean}) \cdot 0.7$ . Power calculations use a two-sample t-test for unequal variances. The planned analysis will use regression to adjust for stratifying baseline variables, making this analysis slightly conservative.
